1 Oral Lichen Planus and its relation with Oral Squamous  
2 Cell Carcinoma: new insights into the potential for  
3 malignant transformation

4 Cristóvão Antunes de Lanna <sup>1\*</sup>; Beatriz Nascimento Monteiro da Silva <sup>2\*</sup>; Andreia  
5 Cristina de Melo <sup>2</sup>; Martín H. Bonamino <sup>3</sup>; Lísia Daltro Borges Alves <sup>2</sup>; Luis Felipe  
6 Ribeiro Pinto <sup>4</sup>; Abel Silveira Cardoso <sup>5</sup>; Héilton Spíndola Antunes <sup>2</sup>; Mariana Boroni  
7 <sup>1,6</sup>; Daniel Cohen Goldemberg <sup>2, 7</sup>.

8 Affiliations

9 1 Laboratory of Bioinformatics and Computational Biology, Division of Experimental and Translational Research,  
10 Brazilian National Cancer Institute (INCA), Rio de Janeiro, 20231-050, Brazil; 2 Division of Clinical Research and  
11 Technological Development of the National Cancer Institute José Alencar Gomes da Silva (INCA). Rio de Janeiro  
12 (RJ), Brazil; 3 Immunology and Tumor Biology Program - Research Coordination, Brazilian National Cancer  
13 Institute (INCA), Rio de Janeiro, Brazil; Presidency of Research and Biological Collections (VPPCB), Oswaldo Cruz  
14 Foundation (FIOCRUZ), Rio de Janeiro, Brazil; 4 Research Department, National Cancer Institute, Rio de Janeiro,  
15 Rio de Janeiro, Brazil; 5 Emeritus Professor - Department of Oral Pathology and Oral Diagnosis, School of  
16 Dentistry, Universidade Federal do Rio de Janeiro, Rio de Janeiro, Brazil; 6 Experimental Medicine Research  
17 Cluster (EMRC), University of Campinas (UNICAMP), Campinas 13083-970, Brazil; 7 Honorary Oral Medicine  
18 Senior Lecturer - University College London (UCL). London, UK. Latin American Cooperative Oncology Group  
19 (LACOG) - Head and Neck.

20  
21 \*These authors contributed equally to this work.

22 Corresponding authors:

23 Mariana Boroni - [mariana.boroni@inca.gov.br](mailto:mariana.boroni@inca.gov.br)

## 24 Abstract

25 Oral Lichen Planus (OLP) is a chronic inflammatory disorder of unknown etiology.  
26 However, evidence suggests that it consists of an immunological process that leads  
27 to degeneration of the keratinocytes in the basal layer of the oral mucosa. Despite  
28 being recognized by WHO as a potentially malignant disorder with progression to oral  
29 squamous cell carcinoma (OSCC), the relationship between both pathologies is still  
30 controversial. Different studies have investigated factors associated with the potential  
31 for malignant transformation of OLP but it remains unclear. Through a bioinformatics  
32 approach, we investigated similarities in gene expression profiles of OLP and OSCC  
33 in early and advanced stages. Our results revealed gene expression patterns related  
34 to processes of keratinization, keratinocyte differentiation, cell proliferation and  
35 immune response in common between OLP and early and advanced OSCC, with the  
36 cornified envelope formation and antigen processing cross-presentation pathways in  
37 common between OLP and early OSCC. Together, these results reveal that key genes  
38 such as *PI3*, *SPRR1B* and *KRT17*, in addition to genes associated with different  
39 immune processes such as *CXCL-13*, *HIF1A* and *IL1B* may be involved in this  
40 oncogenic process. In addition, we performed an analysis of differentially and co-  
41 expressed genes and proposed putative therapeutic targets and associated drugs.

## 42 Introduction

43 Oral Lichen Planus (OLP) is a chronic inflammatory disease clinically  
44 characterized by six distinct subtypes that can be seen individually or in combination:  
45 white reticular striations, papular, plaque-like, erythematous erosions, ulcerative, and  
46 bullous forms. Of all the presentations, the reticular form is the most common,  
47 exhibiting a delicate white banding, called Wickham's striae (Kurago, 2016;

48 Warnakulasuriya et al., 2007; Wickham, 1895). Histologically, OLP is characterized by  
49 vacuolar degeneration, a band-like dense inflammatory infiltrate of T lymphocytes at  
50 the epithelial-stromal junction, and hyperkeratosis or parakeratosis (Cheng et al.,  
51 2016).

52 The origins of this persistent cytotoxic T-cell-mediated damage are currently  
53 unknown. However, many authors suggest that the disease is associated with an  
54 autoimmune process (Farhi and Dupin, 2010; Ismail et al., 2007; Roopashree et al.,  
55 2010; Rutz et al., 2016). In 1910, Hallopeau and colleagues described for the first time  
56 a case of oral squamous cell carcinoma (OSCC), a malignant neoplasm that originates  
57 in the lining epithelium and is considered the most common malignancy in this region,  
58 in a patient with OLP. Since then, different studies have suggested a premalignant  
59 potential for OLP injuries over the years (Aghbari et al., 2017; Bardellini et al., 2013;  
60 Barnard et al., 1993; Hallopeau, 1910).

61 The World Health Organization (WHO) defined in 2017 that OLP is an *oral*  
62 *potentially malignant disorder* (OPMD), with a possible progression to OSCC (Müller,  
63 2017; Peng et al., 2017; van der Waal, 2010). Giuliani and colleagues (2019), in a  
64 systematic review, demonstrated that 92 of 6559 patients diagnosed with OLP  
65 developed OSCC. The authors found a malignancy potential of 1.4% and an annual  
66 transformation rate of 0.2% when analyzing retrospective and prospective studies on  
67 OLP. Ruukonen et al. (2017) revealed that 17.9% of patients with oral cancer had OLP  
68 and 4% had oral lichenoid lesions, suggesting that this dysfunction may be an  
69 important etiological factor of OSCC and that smoking and alcohol use was less  
70 frequent in patients with OLP and lichenoid lesions, suggesting that OLP may progress  
71 to OSCC, even in the absence of well-known etiological agents.

72 In this study, we investigated gene expression signatures observed in OLP  
73 lesions when compared to healthy oral tissues that are also disturbed in the early and  
74 advanced stages of OSCC in order to shed light on the potential for malignant  
75 transformation of OLP. We demonstrate a repertoire of pathways that could be  
76 connected to the potential transition between OLP and OSCC. Our findings suggest  
77 that OLP and OSCC share the activation of keratinization- and inflammation-related  
78 pathways with a potential role in malignization. We have also explored potential novel  
79 therapeutic targets and propose drugs that can interact with them and revert  
80 expression alterations.

## 81 **Results**

### 82 **Gene expression profiles among OLP and OSCCs**

83 Gene expression data (16,656 features) comprising 13 normal oral mucosa, 7  
84 OLP, 10 early-stage OSCC, and 20 advanced-stage OSCC samples were integrated  
85 and compared. Of note, although OLP samples tend to group closer to normal  
86 samples, at least one sample shows high similarity with OSCC samples (Fig. S1).

87 Differential expression analysis was performed for each group in comparison to  
88 normal tissue. A total of 107 DEGs were identified for OLP (83 overexpressed, 24  
89 underexpressed), 331 for early-stage OSCC (182 overexpressed, 149  
90 underexpressed), and 282 for advanced OSCC (96 overexpressed, 186  
91 underexpressed) (Tables S1-S3; Fig. S2A-C). Gene set enrichment analysis (GSEA)  
92 was performed for each group. Enriched pathways in OLP were related to  
93 keratinization, extracellular matrix (ECM) and its interaction with surrounding tissue,  
94 and immunity-related pathways such as complement, interleukin 10 (IL-10) signaling,  
95 antimicrobial peptides, antigen presentation, among others (Table S5). In early and

96 advanced OSCC, enriched pathways included pathways related to keratinization, DNA  
97 replication, RNA transcription, DNA repair, cell cycle, multiple interleukin and  
98 interferon signaling pathways, among others (Tables S6-S7). To better explore OLP's  
99 potential for malignization and its relation with OSCC, the overlapping differentially  
100 expressed genes (DEGs) between OLP and OSCC were also investigated, resulting  
101 in a total of 35 overlapping DEGs (29 Up- and 6 Down-regulated). Fifteen genes were  
102 consistently differentially expressed in all comparisons (10 overexpressed, 5  
103 underexpressed) (Fig. 1A-B; Table S4). Most of the overlapped genes (51.4%)  
104 occurred between OLP and early stage OSCC. When using a non-supervised  
105 clustering approach based on the expression of the 35 gene signature, all OLP  
106 samples were clustered with OSCC samples, mainly in the early stage (Fig. 1C). We  
107 also observed overlap among pathways enriched in the three conditions. The  
108 enrichment analysis revealed that OLP has six main pathways in common with early  
109 or advanced OSCC: antigen processing cross-presentation; formation of the cornified  
110 envelope; interleukin-10 signaling; collagen chain trimerization; non-integrin  
111 membrane-ECM interactions; and neutrophil degranulation, with the antigen  
112 presentation pathway enriched in all conditions. Interestingly, antigen presentation  
113 and formation of the cornified envelope were the only common pathways between  
114 early OSCC and OLP, with the latter being common only between these two groups  
115 (Fig. 1D). Some of the genes influencing the clusterization are those coding for  
116 keratins, including the downregulation of *KRT4* and up-regulation of *KRT16*, *KRT17*,  
117 *KRT10*, and *KRT75* in comparison to normal samples (Fig. 1E).

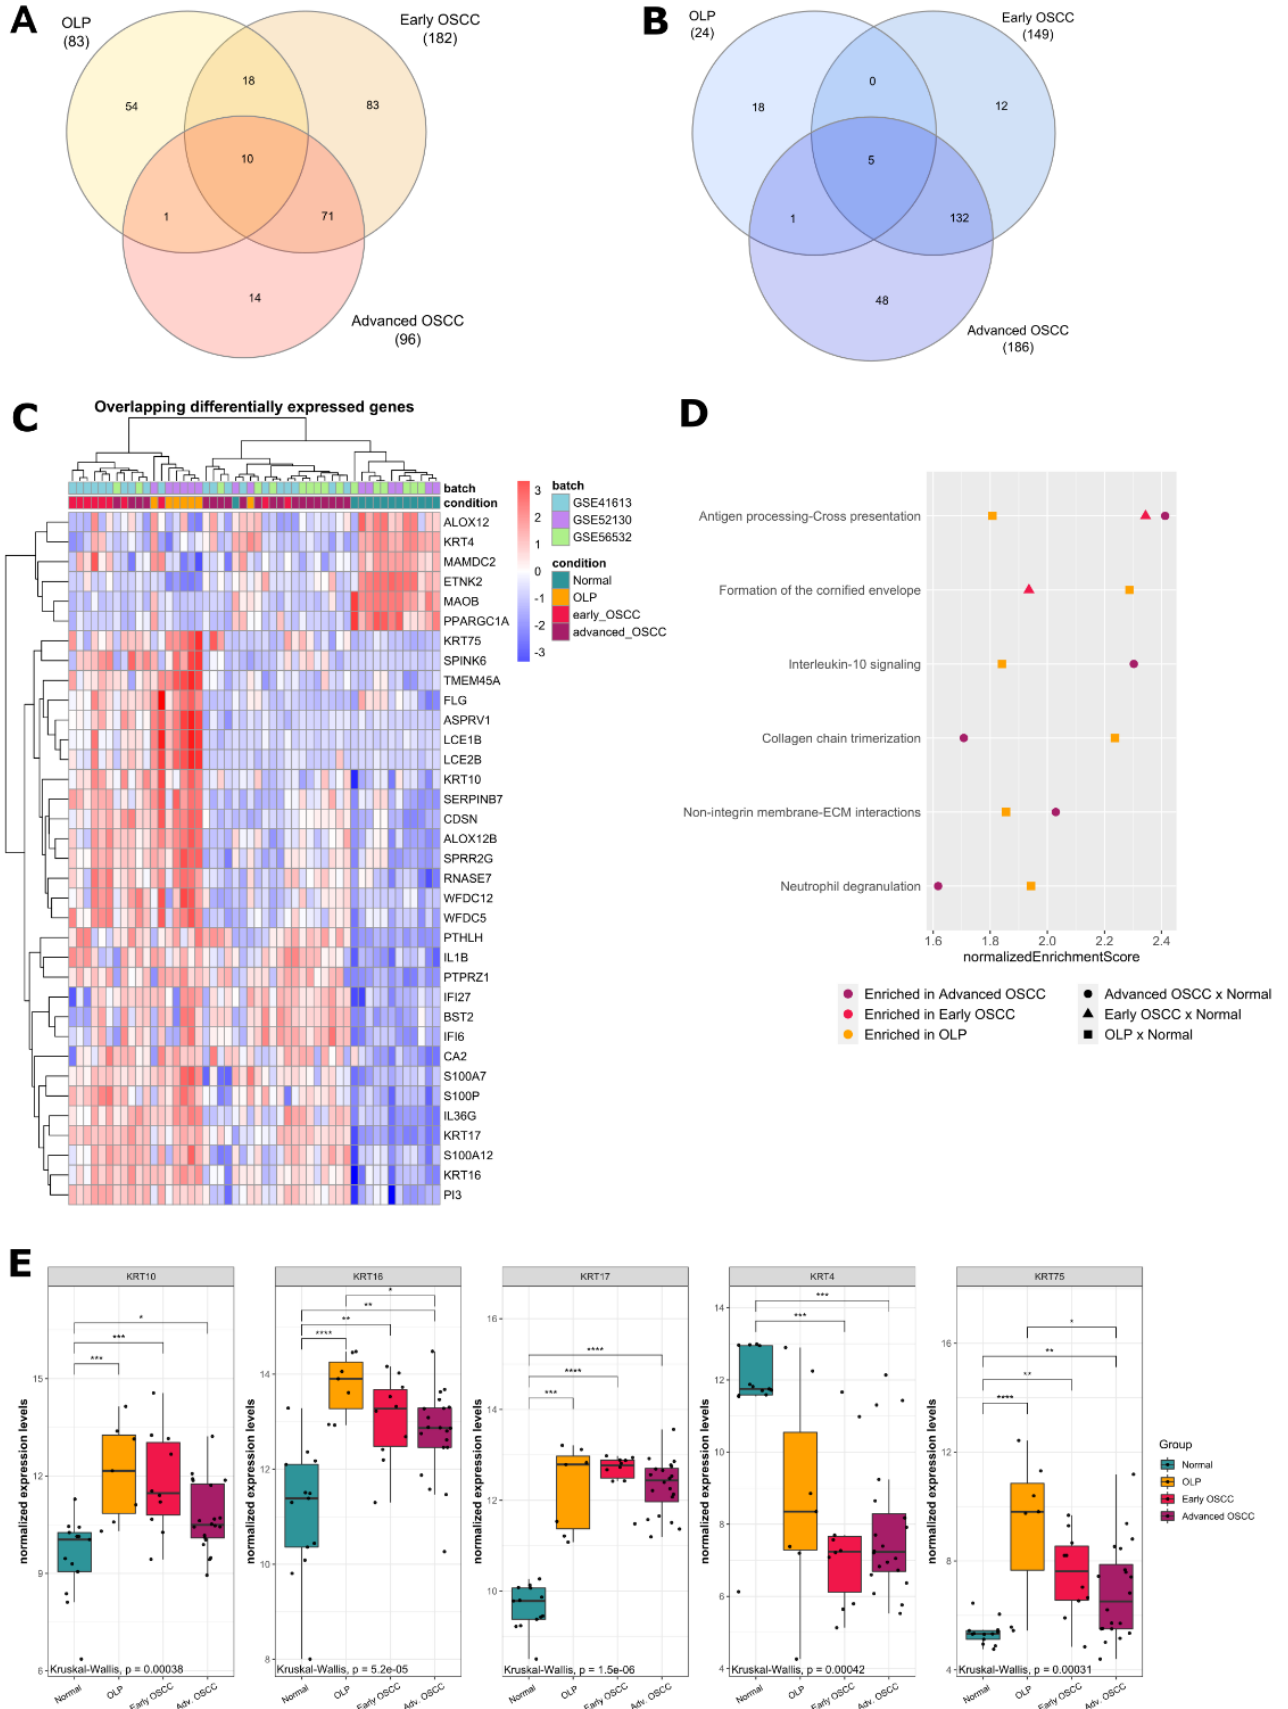

119 **Figure 1.** Differentially Expressed Genes between OLP, early, and advanced OSCC  
120 microarray datasets compared to normal oral tissue. (A) Venn diagram of overlapping  
121 DEGs of overexpressed genes. Ten of the differentially expressed genes were  
122 overexpressed in all three groups, while 18 overexpressed genes were shared by OLP  
123 and early OSCC. (B) Venn diagram of overlapping DEGs of underexpressed genes.  
124 Five of the differentially expressed genes were underexpressed in all three groups.  
125 (C) Clustered heatmap of DEGs shared between OLP, early, and advanced OSCC,  
126 as well as overexpressed genes shared by OLP and early OSCC. (D) Gene set  
127 enrichment analysis (GSEA) of Reactome pathways in Oral Lichen Planus (OLP),  
128 early, and advanced Oral Squamous Cell Carcinoma (OSCC). All pathways are  
129 upregulated in comparison with normal tissue. For each pathway, orange squares, red  
130 triangles, and purple circles correspond to the normalized Enrichment Score for said  
131 pathway in OLP, early OSCC, and advanced OSCC, respectively. Only pathways  
132 enriched simultaneously in OLP and at least one of the OSCC stages are represented.  
133 (E) Differentially expressed keratin genes between OLP and both OSCC groups  
134 compared to normal tissue. Box plots represent the normalized expression distribution  
135 in each group. Comparisons among groups were made using the Kruskal-Wallis test  
136 followed by Dunn's post-hoc test, with p-values lower than 0.05 considered significant  
137 for both tests. \*,  $p < 0.05$ ; \*\*,  $p < 0.01$ ; \*\*\*,  $p < 0.001$ ; \*\*\*\*,  $p < 0.0001$ .

138 Of note, genes coding for keratinocyte differentiation-related members of the  
139 S100 protein family such as *S100A7*, *S100P*, and *S100A12* as well as immunity-  
140 related genes such as *IL1B*, *IL36G*, *IFI6*, and *IFI27*, all of them overexpressed in OLP  
141 samples compared to normal tissue, were also identified. To validate our findings,  
142 independent datasets corresponding to each of the tested groups were used. Similar  
143 results were found to the expression of *KRT4* (lower expression) and *KRT75* (higher

144 expression), whereas differences found in *KRT10*, *KRT16* and *KRT17* expression, all  
145 of them higher than normal in our analysis, have not been validated (Fig. S3A and  
146 S3B). Data obtained from TCGA for early and advanced OSCC showed lower *KRT4*  
147 expression and higher *KRT17* expression when compared with normal samples, also  
148 consistent with our analysis (Fig S3C).

149 Overrepresentation analysis (ORA) was performed for all overlapping DEGs  
150 between OLP and at least one OSCC stage (29 up and 6 down-regulated, Fig 1A and  
151 1B). Pathways enriched in overlapping up-regulated genes included keratinization and  
152 formation of the cornified envelope (Fig. S4A). These pathways were also among  
153 those enriched in OLP-exclusive overexpressed DEGs, which also included immunity-  
154 related pathways, such as interferon alpha and beta and IL-1 family signaling (Fig.  
155 S4B). In OLP-exclusive underexpressed DEGs, the keratinization and formation of the  
156 cornified envelope pathways were also enriched, along with cell junction- and  
157 compound metabolization-related pathways (Fig. S4C). When considering  
158 overlapping underexpressed DEGs, no pathway was significantly enriched.

## 159 **Immune Microenvironment Composition of OLP and OSCC**

160 Given that OLP is a disease with a significant participation of the immune system  
161 and both immune evasion and tumor-promoting inflammation are hallmarks of cancer,  
162 we have sought to identify the most prominent proportions of infiltrating cells in both  
163 conditions. We have used a method that estimates the abundances of cell populations  
164 by deconvolution of gene expression data.

165 When clustering samples based on cell's population composition, OLP samples  
166 mostly clustered with normal samples, although some samples showed high similarity



167 with the immune cells composition found in OSCC samples, enriched in plasma cells  
168 and memory activated CD4+ T cells (Fig. 2A).

169 The proportions of activated NK cells in OLP samples were significantly lower  
170 than the proportions found in the normal oral mucosa. The same was observed for  
171 activated NK cells in early or advanced OSCC. The proportions of CD8+ T  
172 lymphocytes, M0 and M1 macrophages in advanced OSCC showed significantly  
173 higher values when compared to those observed in OLP. The opposite was observed  
174 in resting Mast cells, naïve B cells and monocytes. Reduced proportions for all three  
175 populations were observed in both early and advanced OSCC when compared to OLP  
176 and healthy oral mucosa. The proportions of activated memory CD4+ T cells, resting  
177 NK cells, and M0 macrophages were higher in OSCC than in healthy oral mucosa,  
178 regardless of staging (Fig. 2B). Considering the immune infiltrate populations in both  
179 validation datasets, significantly reduced values of activated NK cells were also  
180 observed in OLP, corroborating our results for this group. Similarly, monocyte  
181 proportions were consistent with our analysis for early and advanced OSCC in the  
182 microarray and TCGA datasets. The resting mast cell proportions were also consistent  
183 with those observed in the analysis, while macrophages M0 showed elevated  
184 proportions in advanced OSCC in the microarray dataset and early and advanced  
185 OSCC in the TCGA dataset, consistently to the proportions in the discovery dataset  
186 (Fig. S5).

187 Since genes that play an important role in the T helper (Th) 17 cell phenotype  
188 such as *IL1B*, *CCL5* and *CXCL13* were differentially expressed in OLP, early and  
189 advanced OSCC (Tables S1-S3), we decided to investigate the genes involved in its  
190 differentiation given the role of Th17 cells in maintaining mucosal immunity  
191 homeostasis. Samples were clustered using a 33-gene panel built based on

192 pathogenic and non-pathogenic Th17 phenotypes characterized in the literature (Lee  
193 et al., 2012) (Fig. 2C). When clustering samples with regard to pathogenic and non-  
194 pathogenic Th17 signature, two groups can be highlighted: one mostly composed of  
195 OSCC samples, showing high expression of many genes from the pathogenic  
196 signature and another composed mainly of OLP and normal samples. In this group,  
197 genes from the non-pathogenic signature are highly expressed (Fig. 2C). Of note,  
198 some genes important in the pathogenic signaling were also found differentially  
199 modulated in OLP samples, such as *CTSC*, *HIF1A*, *IL1B*, *LTA*, *LTB*, and *TGFB3* in  
200 relation to normal oral mucosa. Additionally, *CTSC*, *HIF1A*, and *IL1B* also show higher  
201 expression levels in early and late-stage OSCC, with an increasing pattern (Fig. S6A).  
202 The validation data also revealed significant high levels of expression of the *CTSC*,  
203 *LTA*, and *TGFB3* genes in OLP (Fig. S6B). Regarding the OSCC groups, however,  
204 only *CTSC* and *LTB* exhibited similar expression patterns in comparison to the  
205 discovery dataset (Fig S6C-D). *LTA*, while significantly altered compared to normal  
206 mucosa in the validation datasets, showed different patterns depending on the  
207 validation dataset, with lower expression in the microarray dataset (Fig. S6C) and  
208 higher expression in the TCGA validation dataset (Fig. S6D).

209

210

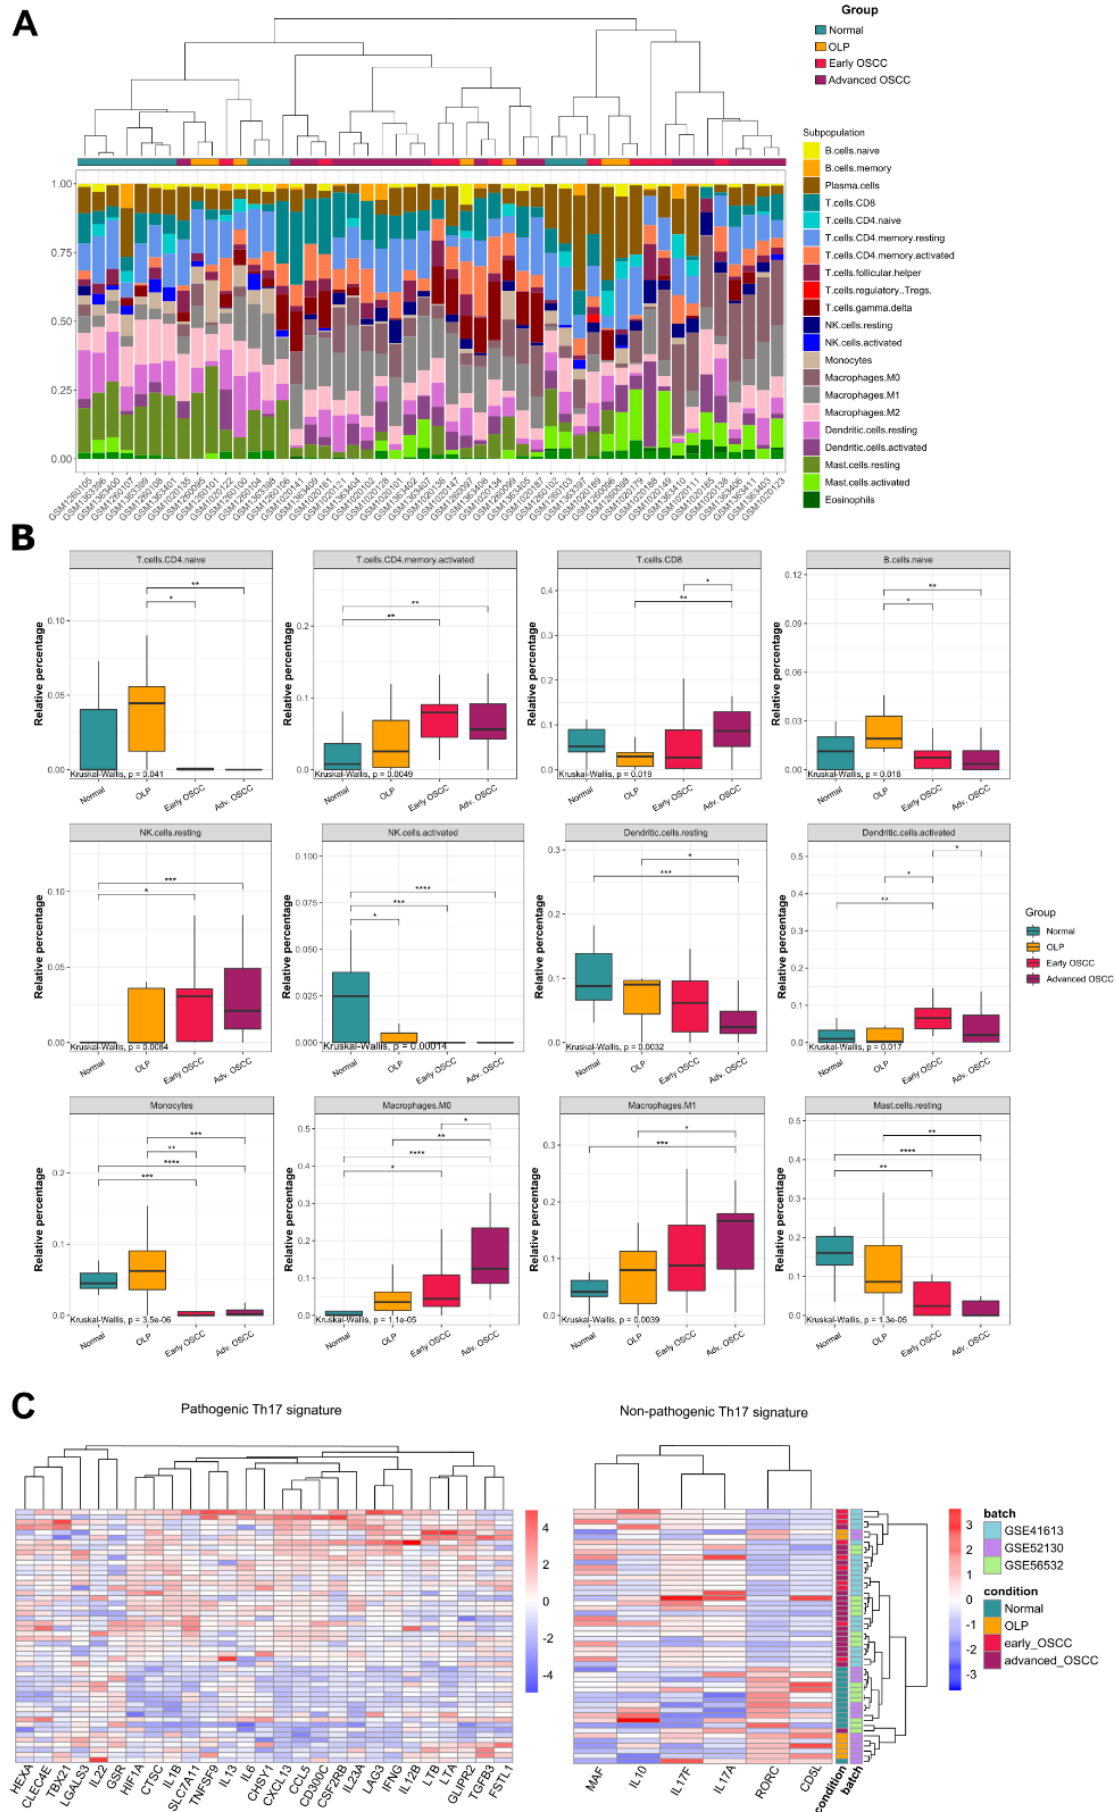

212 **Figure 2.** Proportion of cell population signatures identified using CIBERSORTx. (A)  
213 Stacked barplot showing cell population proportions in each sample (Oral normal  
214 mucosa, OLP, early OSCC, advanced OSCC) based on CIBERSORTx's 22 cell gene  
215 expression signatures. Dendrogram represents Ward clustering of the samples. (B)  
216 Relative percentage of each immune cell from oral normal mucosa, OLP, early and  
217 advanced OSCC. Comparisons among groups were made using the Kruskal-Wallis  
218 test followed by Dunn's post-hoc test, with p-values lower than 0.05 considered  
219 significant for both tests. \*,  $p < 0.05$ ; \*\*,  $p < 0.01$ ; \*\*\*,  $p < 0.001$ ; \*\*\*\*,  $p < 0.0001$ . (C)  
220 Clustered heatmap of Th17-related genes. Genes were separated based on non-  
221 pathogenic and pathogenic Th17 phenotype-related expression profiles.

## 222 **Co-expression analysis**

223 In addition to differential expression analysis, we have also constructed co-  
224 expression modules using WGCNA to investigate the connection strength between  
225 genes with similar expression patterns and identify potentially co-regulated genes  
226 associated with the potential malignization process in OLP. By analysing a total of  
227 15,000 genes (highest gene expression variability among samples), 12 co-expression  
228 modules were obtained, each identified by a color: magenta, with 311 genes; purple,  
229 with 262 genes; blue, with 5059 genes; greenyellow, with 174 genes; tan, with 142  
230 genes; black, with 381 genes; pink, with 370 genes; red, with 525 genes; turquoise,  
231 with 5364 genes; yellow, with 628 genes; brown, with 1070 genes; and green, with  
232 624 genes. A 13<sup>th</sup> module, to which 90 genes with no co-expression patterns were  
233 assigned, was also identified and assigned to the color grey (Fig. 3A).

234 To better understand the relationship between OLP and OSCC, we have  
235 investigated which co-expression modules had a similar correlation to both conditions

236 simultaneously. For each module, the Pearson correlation coefficient of the module  
237 eigengene to the sample groups was calculated. None of the identified modules had  
238 a simultaneous significant correlation with OLP and early and late stage OSCC.  
239 Interestingly, only the magenta module showed a significant and positive correlation  
240 with OLP (Pearson's correlation  $r = 0.46$ ;  $p < 0.0001$ ) and early OSCC ( $r = 0.33$ ;  $p =$   
241  $0.02$ ). Co-expressed genes belonging to this module were mainly associated with  
242 keratinization and formation of the cornified envelope (Fig. 3B).

### 243 **Network analysis**

244 Co-expression modules, while grouping correlated genes, offer only a glimpse of  
245 their dynamic in the cells. To understand how genes in the magenta module interacted,  
246 we added another layer of information, searching for protein-protein interaction (PPI)  
247 data in the STRING database and building a network (Fig. 3C).

248 By characterizing genes from the network according to their characteristics and  
249 connectivity, we identified 11 hubs, 15 transcription factors, 6 clinically actionable  
250 genes and 112 members of gene families in the druggable genome, with some of  
251 those genes classified in more than one category (Table S8). Additionally, drug-gene  
252 interactions were identified using all genes in the module. A total of 89 drugs were  
253 identified, which interacted with 3 of the 11 hubs (Table S9).

254 The hubs' expression levels were compared among conditions, with *PI3* being  
255 the only gene significantly up-regulated in OLP and all OSCC stages compared to the  
256 normal mucosa. Additionally, *FLG*, *SPRR1B*, and *SPRR2G* were significantly up-  
257 regulated in OLP and early OSCC, while *DSP* and *JUP* showed higher expression  
258 levels only in early OSCC and *RPTN* was up-regulated only in OLP. The four

259 remaining hubs (*DSC1*, *DSG1*, *IVL*, and *PKP1*) didn't exhibit significant differences in  
260 expression compared to the normal mucosa (Fig. 3D).

261 The hubs with known drug-gene interactions are *PI3* (up-regulated in OLP and  
262 OSCC), *IVL* (up-regulated in OLP and early OSCC), and *DSP* (up-regulated in OLP  
263 and OSCC) (Fig. 3 C-D, Table S9). This result may direct future selections of drug  
264 targets that could lead to efficient treatment for both diseases simultaneously.

265

266

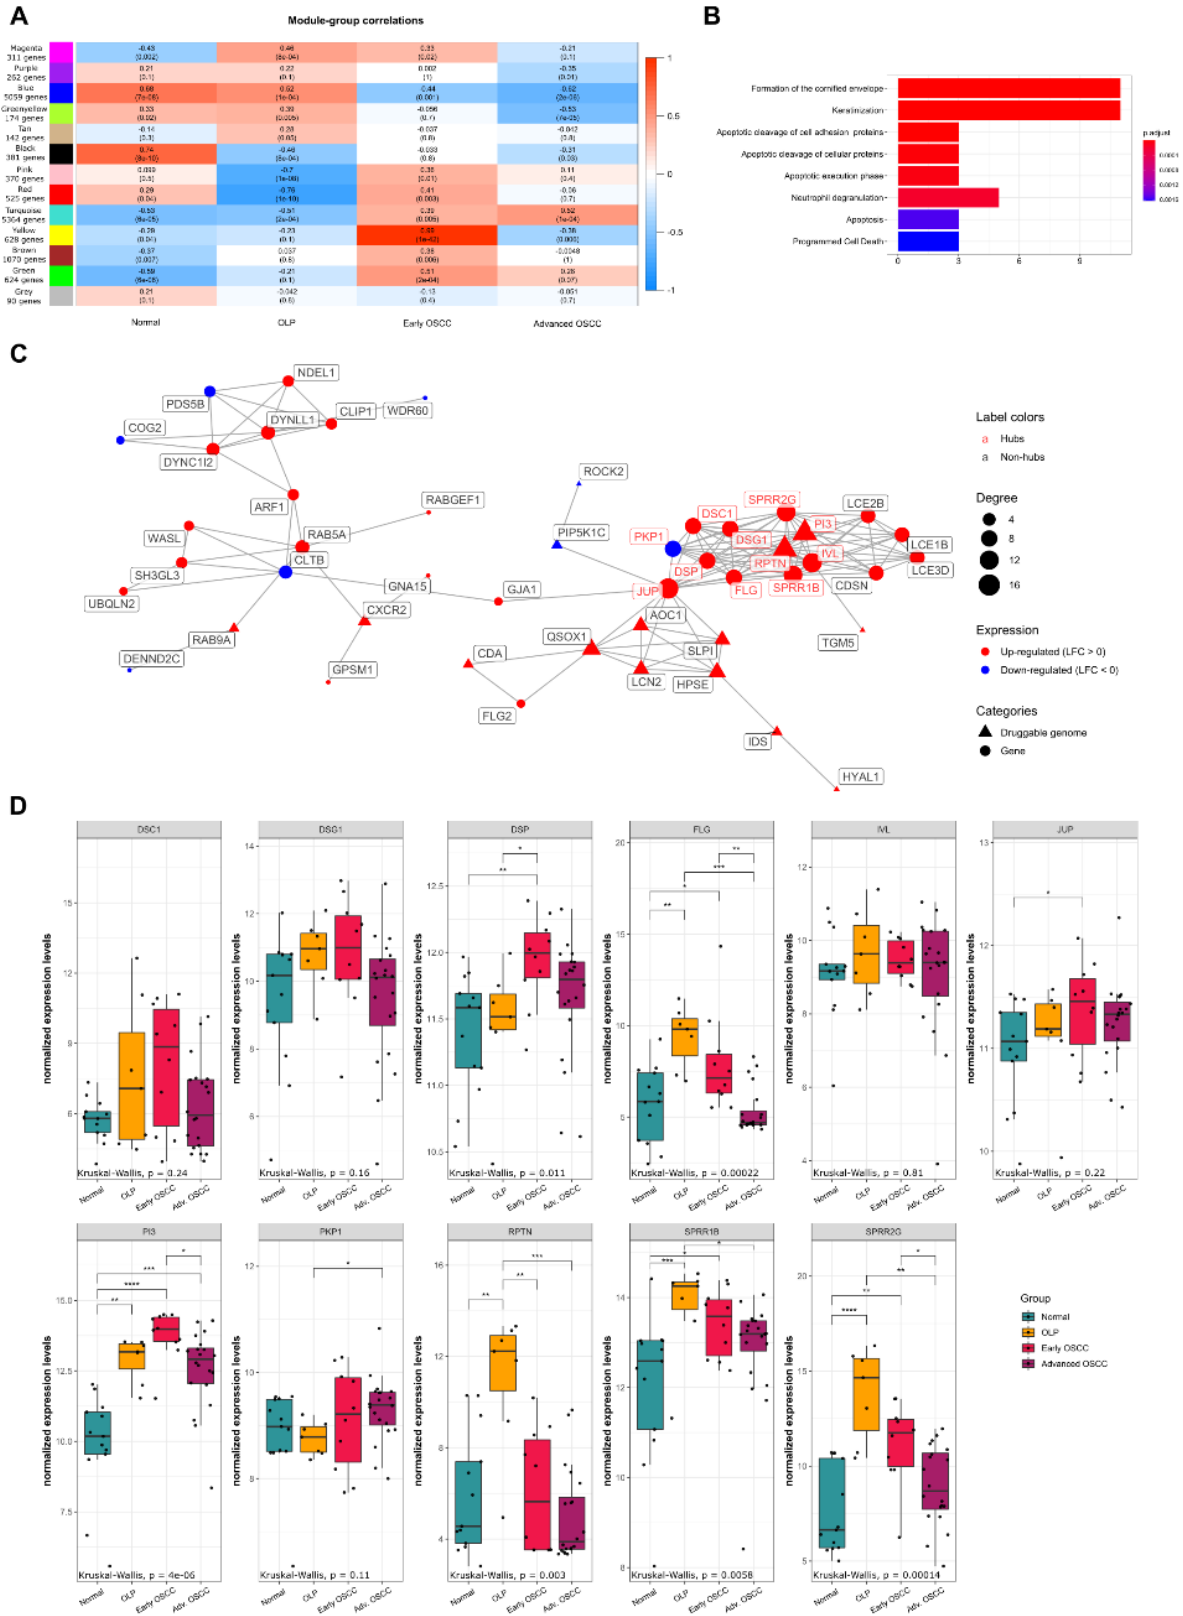

267

268 **Figure 3.** Analysis of co-expressed genes and their regulation. (A) Correlations

269 between the co-expression modules and each of the sample groups (normal tissue,

270 OLP, early OSCC, and advanced OSCC). Cell colors correspond to Pearson  
271 correlation values between each co-expression module (rows) with groups (columns),  
272 from blue (100% inverse correlation) to red (100% direct correlation). Numbers in each  
273 cell refer to Pearson's correlation  $r$  values, with  $p$ -values represented below in  
274 parentheses. Correlations with  $p < 0.05$  were considered statistically significant. (B)  
275 Pathway enrichment of genes in the magenta module using ORA. All represented  
276 pathways are significantly enriched ( $FDR > 0.05$ ). Bar length and colors indicate gene  
277 counts and BH-adjusted  $p$ -values, respectively. (C) Representations of the magenta  
278 module as a PPI network (largest connected component). Node size, shape, and color  
279 represent degree, category, and LFC in OLP, respectively. Red node labels indicate  
280 hubs. (D) Hub genes from the magenta module compared between OLP, both OSCC  
281 groups, and normal tissue. Box plots represent the normalized expression distribution  
282 in each group. Comparisons among groups were made using the Kruskal-Wallis test  
283 followed by Dunn's post-hoc test, with  $p$ -values lower than 0.05 considered significant  
284 for both tests. \*,  $p < 0.05$ ; \*\*,  $p < 0.01$ ; \*\*\*,  $p < 0.001$ ; \*\*\*\*,  $p < 0.0001$ .

## 285 **Expression drug-response analysis**

286       Considering the possibility that the 35 DEGs in common between OLP, early and  
287 advanced OSCC are involved in the potential for malignant transformation, we  
288 investigated pharmacological agents that would best reverse the signature of these  
289 genes. A clustergram of the main drugs was obtained according to L1000 CDS2  
290 output, which demonstrates the expected positive or negative regulation of each drug  
291 in relation to each DEG by comparing them to the LINCS L1000 small molecule-related  
292 expression profiles (Fig. 4). The top fifty matched signatures, corresponding to 42  
293 drugs, were identified based on perturbation data for nineteen of the overlapping



294 DEGs. Six (14.3%) of these drugs are already in use in the clinic or tested in clinical  
295 trials, as indicated in Table S10. Among the predicted drugs the most represented  
296 class was that of the PI3K/mTOR pathway inhibitors, which includes INK-128, GSK  
297 1059615, GDC-0980, Torin-2, KU 0060648 Trihydrochloride, AZD-8055, and PI103  
298 Hydrochloride. The signature of some genes has been reversed by a large number of  
299 drugs in the LINCS L1000 cells' signatures such as *PI3* (32/42 drugs), *KRT17* (30/42),  
300 *KRT10* (29/42), *S100A7* (29/42), and *S100P* (23/42).  
301

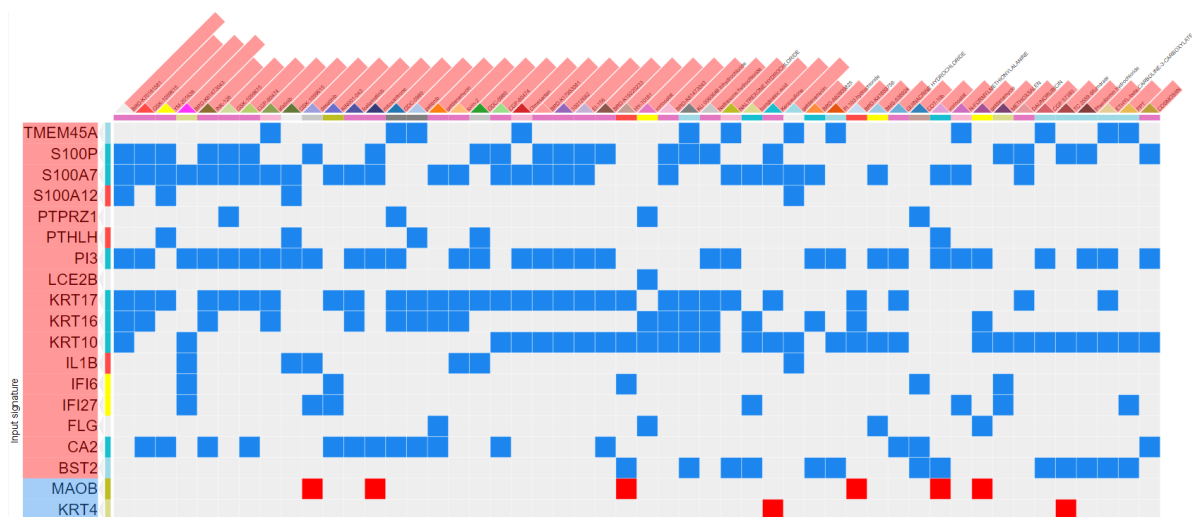

302  
303 **Figure 4.** Potential drug target search from shared DEGs using the L1000 CDS<sup>2</sup> tool  
304 on the LINCS Program platform. Genes are represented in rows and drugs in columns,  
305 with overexpressed genes colored red and underexpressed genes in blue. Colored  
306 squares represent drug-gene interactions, with blue cells representing inhibition and  
307 red cells representing gene activation.  
308

### 309 Drug repositioning evaluation

310 All identified drugs in this work were evaluated for their repositioning potential for  
311 use in OLP and OSCC. Of 89 drugs identified based on the network's hub genes, 70

312 were tested in cancer and 67 were approved in their respective clinical trials. Of these,  
313 only 2 were already tested in OSCC and none was approved for use in this type of  
314 cancer, Cisplatin and Sunitinib (Table S9). Considering the drugs identified based on  
315 the DEGs using the L1000 CDS2 tool, 6 of the 42 drugs were tested and approved for  
316 use in cancer. None of them were tested in OSCC. Additionally, none of the drugs  
317 identified in both analyses have been tested in OLP (Table S10).

## 318 **Discussion**

319         According to the World Health Organization, OLP is categorized as a potentially  
320 malignant disorder, with the possibility of progression to OSCC. Despite its well-known  
321 status, the relationship between OLP and OSCC remains controversial (Gonzalez-  
322 Moles et al., 2008; Peng et al., 2017; Shen et al., 2011). Also, few studies have  
323 compared OLP with OSCC using high-throughput data (Giacomelli et al., 2009; J. Liu  
324 et al., 2020) and, to the best of our knowledge, no studies have simultaneously  
325 analyzed OLP and OSCC progression using high-throughput molecular data analysis.  
326 Based on this lack of information, we have sought to uncover which mechanisms are  
327 involved in this transformation. OLP, early OSCC, and advanced OSCC mRNA  
328 microarray data were analyzed to investigate similarities between gene expression  
329 profiles from the three conditions and correlating them to OLP malignant  
330 transformation potential.

331         Differential expression analysis revealed a subset of genes that are consistently  
332 modulated in OLP and OSCC, suggesting that there are similar pathways activated in  
333 the two conditions. Most of these genes modulated in both OLP and OSCC are related  
334 to keratins and keratinocyte differentiation. Shimada et al. (2018) demonstrated that  
335 cornified envelope formation proteins would be up-regulated in OLP, contributing to a

336 hyperkeratosis state commonly observed in this pathology. In accordance with this,  
337 OLP presented the enriched and up-regulated cornified envelope formation pathway  
338 that was also found in early OSCC, suggesting that changes in proteins belonging to  
339 this pathway may be involved in the malignization processes leading to progression  
340 from OLP to OSCC. Our co-expression and network analyses reinforce this hypothesis  
341 by revealing that genes belonging to the cornified envelope formation and  
342 keratinization pathways were consistently co-regulated in OLP and early OSCC.  
343 Among the genes belonging to these pathways, *PI3* (peptidase inhibitor 3) stands out,  
344 which was also significantly upregulated in the three conditions. Kengkarn et al.  
345 (2020), through microarray analysis, identified that *PI3*, along with *KRT17*, were  
346 upregulated in 100% of OSCC samples (39 cases), suggesting that these genes can  
347 be used as molecular biomarkers for patients with OSCC. This gene was also  
348 identified as belonging to the druggable genome, a set of genes that code for proteins  
349 belonging to families suitable for drug development, which opens possibilities for  
350 developing compounds that interact with its protein (Hopkins and Groom, 2002; Russ  
351 and Lampel, 2005). In addition, it is interesting to note that the *SPRR1B*, *SPRR2G* and  
352 *FLG* genes were significantly upregulated in OLP and early OSCC, but not in  
353 advanced OSCC, when compared to healthy oral mucosa samples. The *SPRR* (Small  
354 PRoline Rich) gene family encodes cornified envelope precursor proteins and are  
355 closely related to keratinocyte differentiation (Patel et al., 2003). The role of *SPRR2G*  
356 in OLP and OSCC has not yet been investigated, however, it has been seen that  
357 squamous cell carcinoma of the vulva overexpresses this gene (Micci et al., 2013). As  
358 for *SPRR1B*, it was shown that its expression is up-regulated in OSCC-derived stem  
359 cells, in addition to having a role in the growth and proliferation of these cells by  
360 regulating *RASSF4*, a tumor suppressor gene related with the MAPK pathway,

361 suggesting that the overexpression of *SPRR1B* may be related to the carcinogenesis  
362 of OSCC, as well as the maintenance of stem cells of this carcinoma (Michifuri et al.,  
363 2013). Filaggrin, coded by the *FLG* gene, is a protein located in the stratum corneum  
364 of the skin, contributing to its integrity and strength (McGrath and Uitto, 2008), and  
365 patients with OLP have an altered distribution and overexpression of this protein in the  
366 oral mucosa (Larsen et al., 2017). Though filaggrin may be involved in lesions in the  
367 oral mucosa (Itoiz et al., 1985), further investigations are needed to show the role of  
368 this protein and the malignancy potential of OLP.

369 *KRT17* is overexpressed in OSCC and it may be associated with tumor  
370 progression by stimulating multiple signaling pathways (Kitamura et al., 2012; Ohkura  
371 et al., 2005). Shen et al. (2006) suggested that Keratin 17 may serve as  
372 immunodominant T cell epitopes by stimulating peripheral blood lymphocytes in  
373 psoriasis. Liu et al. (2020) demonstrated that high *KRT17* expression levels and tumor  
374 differentiation stage were significantly associated with overall survival in 64 patients  
375 with esophageal squamous cell carcinoma (ESCC), suggesting that *KRT17* may be a  
376 tumor-promoting factor and that an increase in the expression of this keratin may  
377 contribute to the malignant progression of the carcinoma. Furthermore, the authors  
378 demonstrated that *KRT17* plays a role in proliferation, migration, growth, and  
379 metastasis of ESCC cells *in vitro* and *in vivo*. Similar results were observed by Wang  
380 et al. (2019) in non-small cell lung cancer (NSCLC). The authors noted that high  
381 *KRT17* expression levels correlated with poor prognosis in NSCLC, especially in lung  
382 adenocarcinoma. Although not significantly differentially expressed in OLP samples  
383 from our validating dataset, which may be related to the low number of samples  
384 available, the upregulation of *KRT17* in OLP may also play an important role  
385 associated with the malignization process. Interestingly, *KRT17* is one of the main

386 therapeutic targets found in our analyses. Based on these results, it is suggested that  
387 *KRT17*, as well as the related pathways, are important for studying the pathology and  
388 malignancy potential of OLP to OSCC, since this gene seems to be involved in the  
389 transition between both diseases. Besides, our data reveal the elevated and significant  
390 expression of *KRT10* in contrast with low levels of *KRT4* in both conditions when  
391 compared to the normal oral mucosa. Sakamoto et al. (2011) demonstrated that *KRT4*  
392 down-regulation in oral squamous cell carcinoma is associated with changes in the  
393 morphology of the epithelium and could be associated with the overexpression of other  
394 keratins such as *KRT17*. Therefore, the authors suggest that *KRT4* may serve as a  
395 diagnostic biomarker for OSCC. The same was suggested by Schaaïj-Visser et al.  
396 (2009) when revealing that the low expression of *KRT4* in samples from patients with  
397 head and neck squamous cell carcinomas (HNSCC), including OSCC samples, may  
398 serve as a screening biomarker for local recurrence risk and allow selection for  
399 adjuvant treatment or tertiary prevention studies. Similar results were observed by Liao  
400 et al. (2012) in OLP lesions, which generally affect the non-masticatory mucosa (such  
401 as the bilateral buccal mucosa), with a shift in keratin expression observed by an  
402 increased expression of *KRT10* and reduced expression of *KRT4*. These data were in  
403 agreement with our analyses on the reduction of *KRT4* in OLP. However, further  
404 investigation is needed regarding *KRT10*, because although the validation analyses  
405 suggest an increase in its expression, the difference in expression is not significant, in  
406 disagreement with what was observed in our analysis.

407 Our analysis showed that antigen presentation is the only pathway enriched  
408 and upregulated in the three evaluated conditions. Antigen cross-presentation seems  
409 to be involved in the early processes of OLP pathogenesis.

410           However, the nature of the antigen responsible for triggering the immune  
411 response in OLP has not yet been unveiled. When analyzing the genes present in the  
412 antigens cross-presentation pathway in OLP and early and advanced OSCC, we  
413 observed genes associated with different tumor responses such as genes belonging  
414 to HLA (*HLA-E*; *HLA-F* and *HLA-G*), among which *HLA-G* which has been identified  
415 as an immune evasion-related gene in different tumors through the inhibition of  
416 effector cells such as NK, T cells, monocytes, and dendritic cells (Krijgsman et al.,  
417 2020). This gene was associated with OSCC prognosis and indicated as a new  
418 therapeutic target (Shen et al., 2018). In addition, most of the genes associated with  
419 antigen cross-presentation belong to the proteasome subunits, which have been  
420 associated with worse prognosis, tumor progression, and metastasis in different  
421 tumors (Ding et al., 2020; Kakumu et al., 2017; Munkácsy et al., 2010; Tan et al.,  
422 2018). Interestingly, among these *PSMB10*, one of the subunits of the  
423 immunoproteasome, was found differentially expressed in the three conditions.  
424 Immunoproteasome has been the subject of several studies due to its role in the  
425 differentiation of T cells, cytokine regulation, and tumor progression (Chen et al., 2020;  
426 Kiuchi et al., 2021; Zervas et al., 2020). In addition, it is known that the peptides  
427 generated by the immunoproteasome for MHC class I are capable of generating a  
428 more efficient and accentuated cytotoxic lymphocyte response than those generated  
429 by the constitutive proteasome, contributing to CD8+ T cell infiltration (Groettrup et al.,  
430 2001; Kloetzel, 2001). We hypothesise that antigen presentation mediated by the  
431 immunoproteasome may contribute to the immune infiltrate profile present in OLP and  
432 OSCC. Further investigations, however, are needed on the interaction between  
433 antigen presentation and cytokines participating in the pathogenesis of OLP and  
434 OSCC, mainly on their role in the potential for malignant OLP transformation. Although

435 previous studies have shown that the immune infiltrate profile in OLP is predominantly  
436 composed of CD8+ and CD4+ T cells (Iijima et al., 2003; Wang et al., 2016), our  
437 analyses through gene signature deconvolution have demonstrated a significantly  
438 reduced proportion of CD8+ T lymphocytes and NK cells in those samples. Still on the  
439 predominant microenvironment components in OLP, we demonstrate an up-regulated  
440 signature of the chemokine CXCL-13, which has a dual role in tumorigenesis  
441 (Kazanietz et al., 2019).

442 The participation of Th17 cells in OLP and OSCC pathogenesis has also been  
443 recently investigated. Th17 is related to the maintenance of chronic inflammation in  
444 many conditions, notably autoimmune diseases (Awasthi and Kuchroo, 2009).  
445 Pathway enrichment and gene expression analyses performed in this study  
446 demonstrated that pathogenic Th17-related pathways were positively correlated to  
447 OSCC, which is corroborated by findings by Gaur et al. (2012), that also demonstrated  
448 an increase in Th17 cell prevalence in OSCC patients' peripheral blood when  
449 compared to a healthy control group. In contrast, it is observed that in the heatmap of  
450 Th17 phenotype-related genes, the general expression profile of most OLP samples  
451 is closely related to the sample profile of the normal mucosa. However, two samples  
452 clustered with early and advanced OSCC samples. This result suggests that different  
453 samples of OLP may have different expression profiles, which may be related to lower  
454 or higher risk of malignant transformation. Also, individual investigations of gene  
455 expressions related to the pathogenic Th17 molecular signature in OLP showed  
456 significantly high levels when compared to samples of normal oral mucosa for several  
457 genes such as *TGFB3*, *IL1B*, *HIF1A*, *LTA*, and *LTB*. The role of HIF-1 $\alpha$  in the potential  
458 for malignant transformation of OLP has been the subject of investigation. Wang et al.  
459 (2017) showed that *HIF1A* was upregulated in OLP and OSCC samples, contributing

460 to changes in the expression of genes involved in adaptation to hypoxia and tumor  
461 progression. Additionally, Yang et al. (2020) demonstrated that the activation of  
462 *HIF1A*, by the accumulation of succinate, plays a fundamental role during the  
463 malignant transformation of OLP by stimulating the apoptosis of keratinocytes.  
464 Besides, as *HIF1A* is also related to increased transcription of *IL1B* by cells of the  
465 immune system (Corcoran and O'Neill, 2016; Ge et al., 2019), it is suggested that the  
466 increased expression of both may be correlated. Together, these results suggest that  
467 OLP may have elements of a tumor-like microenvironment as proposed by Peng et al.  
468 (2017).

469         Interestingly, in our drug signature analysis, IL-1 $\beta$  was suggested as a target  
470 for treatment with the drugs such as GSK-1059615, Torin-2, and GDC-0980, which  
471 are PI3K/mTOR inhibitors (Leontieva and Blagosklonny, 2016). Only GSK-1059615  
472 has already been investigated in OSCC, being able to reduce the proliferation of  
473 OSCC cell lines (Yang et al., 2020). In OLP lesions, Ma et al. (2019) showed the  
474 overexpression of phosphorylated IGF1R and TRB3, which are related to the  
475 PI3k/AKT/mTOR signaling pathway, suggesting that this pathway mediates the  
476 relationship between T cells and keratinocytes, and influences the imbalanced  
477 cytokine networks on the immune microenvironment. According to the data presented  
478 in this study, four other mTOR pathway inhibitors were identified as candidate drugs  
479 (PI-103; INK-128; KU-0060648 and AZD-8055). Among them, PI-103 and INK-128  
480 treatment demonstrated inhibition of cell growth and proliferation of OSCC (Aggarwal  
481 et al., 2019; Liang et al., 2019). Also, AZD-8055, an inhibitor of both mTORC1 and  
482 mTORC2, was able to induce autophagy in HNSCC cells (Li et al., 2013). Although  
483 corticosteroids are recommended for the treatment of OLP, in this work we



484 demonstrated different pharmacological agents that could assist in the treatment and  
485 possibly interfere with the malignancy potential of such lesions.

486 Although our analyses have uncovered some of the genes and pathways  
487 potentially involved in the transformation from OLP to OSCC, the limited availability of  
488 public OLP data made it difficult to acquire gene expression data. However, even  
489 though the low number of available OLP data led us to perform the analysis using  
490 batch-corrected datasets from different platforms, we were able to discover important  
491 biological similarities between the conditions which may point us to better understand  
492 the malignization process.

493 In conclusion, *in silico* analysis revealed that OLP is a pathology that has a  
494 proximity to the gene expression profile of OSCC, mainly with early OSCC. This result  
495 is compatible with the fact that OLP is a differential diagnosis of epithelial precursor  
496 lesions, namely leukoplakia and erythroleukoplakia, which can give rise to initial OSCC  
497 if not removed surgically. We clearly reveal signatures in common with the two  
498 conditions that can be important targets for drug treatment, as well as in the  
499 development of diagnostic and prognostic strategies for the disease. It is considered  
500 that OLP and OSCC have multifactorial etiology, and the intersections between the  
501 keratinization and differentiation of lymphocytes are interesting potential targets for  
502 further investigation.

## 503 **Materials and methods**

### 504 **Datasets**

505 Gene expression data from mRNA microarray experiments were obtained from  
506 NCBI's Gene Expression Omnibus (GEO) (Barrett et al., 2013) using the GEOquery  
507 R package (Davis and Meltzer, 2007). The datasets used corresponded to accession

508 numbers GSE52130, GSE56532, and GSE41613. From the dataset GSE52130 only  
509 oral samples were used, consisting of 7 OLP samples and 7 normal oral tissue  
510 samples, with expression values measured using the Illumina HumanHT-12 V4.0  
511 expression BeadChip array platform. GSE56532 consisted of gene expression from  
512 10 advanced OSCC samples and 6 normal oral mucosa samples, measured using the  
513 Affymetrix Human Gene 1.0 ST Array platform. GSE41613 is a dataset containing  
514 gene expression data of 97 HPV-negative samples from OSCC at varied stages,  
515 measured using the Affymetrix Human Genome U133 Plus 2.0 Array platform. Since  
516 this dataset contained a much larger sample size compared to the others, we have  
517 randomly selected a subset of 20 samples, ten of them at stages I and II (samples  
518 GSM1020161, GSM1020136, GSM1020149, GSM1020147, GSM1020122,  
519 GSM1020134, GSM1020188, GSM1020189, GSM1020138, and GSM1020179), and  
520 ten of them at stages III and IV (samples GSM1020128, GSM1020141, GSM1020185,  
521 GSM1020101, GSM1020121, GSM1020135, GSM1020123, GSM1020111,  
522 GSM1020102, and GSM1020187), to keep group sizes similar and avoid  
523 disproportionately large groups to skew subsequent analyses.

524 Results were validated using independent microarray expression datasets from  
525 GEO as well as RNA-seq expression data from The Cancer Genome Atlas (TCGA).  
526 Validation microarray expression datasets from GEO correspond to accession  
527 numbers GSE38616 and GSE3524. GSE38616 consisted of 7 OLP and 7 normal oral  
528 mucosa, with expression measured on the Affymetrix Human Gene 1.0 ST Array  
529 platform. GSE3524 was composed of 16 OSCC samples in stages II and IV and 4  
530 normal tissue samples, with staging information missing for 2 of the tumor samples,  
531 which were removed from the analysis. mRNA expression for this dataset was  
532 measured on the Affymetrix Human Genome U133A Array platform. Outliers were

533 identified in each dataset using PCA and removed. GSE38616 had three outliers,  
534 GSM946266 (OLP), GSM946263 (OLP), and GSM946254 (Normal); while GSE3524  
535 had one outlier, GSM80467 (advanced OSCC). For TCGA samples, expression data  
536 were downloaded in the form of raw counts from the Head and Neck Squamous cell  
537 Cancer (TCGA-HNSC) project using the TCGAbiolinks R package (Colaprico et al.,  
538 2016). Primary tumor and normal samples belonging to the "Other and unspecified  
539 parts of tongue", "Base of tongue", "Lip", "Palate", "Gum", "Floor of mouth", "Other and  
540 unspecified parts of mouth", and "Oropharynx" sites were considered OSCC samples  
541 and used in this step.

## 542 **Data integration and cross-platform normalization**

543 Data integration and cross-platform normalization were performed in the  
544 discovery datasets according to the methods described in (Binato et al., 2018) and  
545 (Walsh et al., 2015) Files containing probe-level intensity data (CEL files for Affymetrix  
546 arrays and txt files for Illumina BeadChip arrays) were downloaded using GEOquery.  
547 Raw data files were preprocessed using the appropriate package for each platform  
548 (*oligo* for Affymetrix and *beadarray* for Illumina). Probe level data was extracted,  
549 background corrected, and normalized, with the robust multi-array average (RMA)  
550 method used for Affymetrix datasets and *neqc* for the Illumina BeadChip dataset.  
551 Probes were mapped to genes using each platform's annotation, with the resulting  
552 matrix containing 16,656 features. When multiple probes corresponded to the same  
553 gene, normalized expression was aggregated to gene mean values. Batch effects  
554 were corrected using the ComBat method (Johnson et al., 2007) implemented in the  
555 *sva* R package (Leek et al., 2012), considering dataset of origin and sample type as

556 variables. Samples were grouped using principal component analysis (PCA) to  
557 validate that the batch effect correction was successful.

## 558 **Differential expression analysis**

559 Differential expression analysis was conducted using the limma R package  
560 (Ritchie et al., 2015). Gene expression from OLP, early OSCC (stages I and II), and  
561 advanced OSCC (stages III and IV) were compared to normal samples. Differentially  
562 expressed genes (DEGs) were identified based on the following cutoffs: Benjamini-  
563 Hochberg (BH)-adjusted  $p < 0.05$  and  $\log_2$  fold change (LFC)  $> 2$ . DEGs from each  
564 comparison were overlapped using the InteractiVenn online tool (Heberle et al., 2015).  
565 Heat maps were constructed using the pheatmap R package (Kolde, 2019), using  
566 normalized expression values z-scored across samples. Rows representing genes  
567 were clustered using Pearson correlation. Columns representing samples were  
568 clustered using the *hclust* function, with non-supervised hierarchical clustering  
569 performed based on sample distance, measured as  $1 - \text{Pearson correlation coefficient}$ .  
570 For individual genes, boxplots were plotted using the ggplot2 package (Wickham,  
571 2016). Comparisons among groups were made using the Kruskal-Wallis test followed  
572 by Dunn's post-hoc test, with p-values lower than 0.05 considered significant for both  
573 tests. For RNA-Seq data, expression counts were normalized using variance  
574 stabilizing transformation through the DESeq2 R package (Love et al., 2014).

575 Differences in some of the genes' expressions among analyzed groups were also  
576 evaluated using the Kruskal-Wallis test followed by pairwise comparisons using  
577 Dunn's test. In both cases,  $p < 0.05$  indicated a significant difference.

## 578 **Pathway enrichment analysis**

579 Gene Set Enrichment Analysis (GSEA) was performed on LFC-ranked genes in  
580 each condition using the WebgestaltR R package (Liao et al., 2019; Subramanian et  
581 al., 2005). The analysis was performed with 1,000 permutations. The false discovery  
582 rate (FDR) cutoff was 0.05. Pathways with a minimum of 5 genes were selected.  
583 Result lists for each group had redundant pathways reduced using Webgestalt's  
584 implementation of the Affinity Propagation algorithm. A subsequent filter kept all gene  
585 sets that were enriched in OLP and at least one of the OSCC stage groups. These  
586 results were presented in dotplots using the ggplot2 package.

587 Overrepresentation analysis was performed for overlapping and OLP-exclusive  
588 DEGs, as well as co-expression modules' genes using the ReactomePA R package  
589 (Yu and He, 2016). Pathways with a minimum of 5 genes and FDR < 0.05 were  
590 selected, and the Benjamini-Hochberg (BH) method for multiple testing p-value  
591 correction was used (Benjamini and Hochberg, 1995). Pathways from the Reactome  
592 database were used for both GSEA and ORA (Jassal et al., 2020).

## 593 **Immune Infiltration Cells Analysis**

594 Tumor immune infiltration cells composition was estimated using CIBERSORTx  
595 (Newman et al., 2019). This tool uses a deconvolution algorithm to estimate immune  
596 cell types using gene expression data from samples composed of multiple cells (bulk).  
597 Batch-corrected, normalized expression data was used to estimate TIICs using  
598 CIBERSORTx's gene signatures for 22 cell types. These cell populations include naïve  
599 B cells, memory B cells, plasma cells, 7 T cell types (CD8+ T cells, naïve CD4+ T  
600 cells, resting CD4+ memory T cells, activated CD4+ memory T cells, follicular helper  
601 T cells, Tregs,  $\gamma\delta$  T cells), macrophages (M0 macrophages, M1 macrophages, M2

602 macrophages), resting mast cells, activated mast cells, resting NK cells, activated NK  
603 cells, resting dendritic cells (resting DC), activated dendritic cells (activated DC),  
604 monocytes, eosinophils, and neutrophils.

605 Stacked bar plots were generated from relative cell type populations using  
606 ggplot2. Samples were clustered using the hclust function. Distances based on 1 -  
607 Pearson correlation coefficient were used for Ward clustering of samples. Population  
608 scores were individually compared between groups using Kruskal-Wallis test, followed  
609 by pairwise comparisons using Dunn's test. In both cases, significant differences were  
610 identified by  $p < 0.05$ .

611 Additionally, the signatures of genes related to pathogenic and non-pathogenic  
612 Th17 cells were investigated using a 33-gene signature panel based on a previous  
613 characterization of Th17 phenotypes in the literature (Lee et al., 2012). Gene  
614 expression and sample clustering visualizations for pathogenic and non-pathogenic  
615 Th17 cell signatures were made using the pheatmap R package (Kolde, 2019).  
616 Boxplots for the signature's genes were plotted using the ggplot2 package (Wickham,  
617 2016). Comparisons among groups were made using the Kruskal-Wallis test followed  
618 by Dunn's post-hoc test, with p-values lower than 0.05 considered significant for both  
619 tests.

## 620 **Co-expression analysis**

621 Gene co-expression modules were constructed using the Weighted Gene Co-  
622 expression Network Analysis (WGCNA) R package (Langfelder and Horvath, 2008;  
623 Zhang and Horvath, 2005). The 15,000 genes with the highest median absolute  
624 deviation (MAD) were selected from the integrated dataset and used as input. A gene  
625 pair similarity matrix was generated based on Pearson correlation and converted to a

626 weighted adjacency matrix by elevating it to a  $\beta$  value of 6. This matrix was used to  
627 build a topological overlap (TOM) and a dissimilarity matrix ( $1 - \text{TOM}$ ). The dissimilarity  
628 matrix was used to build unsigned co-expression modules with a minimum size of 100  
629 genes. WGCNA's module-trait relationship function was used to calculate correlations  
630 between module eigengenes and each of the groups (OLP, early OSCC, advanced  
631 OSCC, and normal samples). Correlations were considered significant when  $|r| \geq 0.3$ ,  
632 and  $p < 0.05$ .

### 633 **Interaction networks construction and drug-gene interactions** 634 **identification**

635 Genes in the magenta module were used to build a protein-protein interaction  
636 (PPI) network using interaction data from the STRING database, v. 11 (Szklarczyk et  
637 al., 2019). Interactions with a confidence score  $< 0.9$  and disconnected vertices were  
638 discarded. Hub genes were determined by selecting vertices with a degree over the  
639 9th decile of the network's degree distribution and comparisons in the individual hubs'  
640 expression levels were performed as described in the differential expression section.

641 Gene categories and FDA-approved, antineoplastic drug-gene interactions for  
642 hubs were identified using the DGIdb online tool (Freshour et al., 2021). Clinically  
643 actionable genes, transcription factors, and genes coding for protein families  
644 belonging to the druggable genome were identified (Hopkins and Groom, 2002; Russ  
645 and Lampel, 2005). Information such as  $\log_2$  fold change, identified gene categories,  
646 degree, and whether a gene is a hub were also added to the network. The graph's  
647 largest connected component was used for visualization. Network manipulation was  
648 made using the igraph and tidygraph R packages (Csardi and Nepusz, 2006;

649 Pedersen, 2020). Network plots were constructed using the ggraph R package  
650 (Pedersen, 2021).

## 651 **Search for expression drug-response for differentially expressed** 652 **genes**

653 Overlapping DEGs were used to search for drugs able to revert their expression  
654 signatures using the L1000 Characteristic Direction Signature Search Engine  
655 (L1000CDS<sup>2</sup>) tool on the Library of Integrated Network-Based Cellular Signatures  
656 (LINCS) Program platform (Duan et al., 2016; Stathias et al., 2020). This tool  
657 compares input differentially expressed genes to LINCS-L1000 gene perturbation  
658 data. Drug-gene combinations were ranked by search score, calculated based on the  
659 overlap between input DEGs and signature DEGs, that is, gene sets that follow the  
660 same perturbation patterns (up-regulating underexpressed genes or down-regulating  
661 overexpressed genes) when interacting with a small molecule. The top 50 drug  
662 signatures are presented as output. Additionally, putative drug combinations among  
663 the small molecule signatures were estimated using this tool. Drug combinations were  
664 ranked based on their signature overlaps and the top 50 combinations were provided.

## 665 **Drug repositioning opportunities evaluation**

666 Drugs identified both by interactions with hub genes and by investigating  
667 expression reversion signatures were evaluated for repositioning opportunities using  
668 the repoDB database, which compiles information from clinical trials (Brown and Patel,  
669 2017). Drugs were searched for in the database and evaluated for whether they were  
670 already tested in OSCC, OLP, or other neoplasms. In the case when a drug was used  
671 in clinical trials, we have evaluated if it was approved or not for clinical use.



## 672 **Acknowledgements**

673           The authors would like to thank the Plataforma Multiusuário de Bioinformática of  
674 Instituto Nacional de Câncer (INCA) for providing the infrastructure for performing the  
675 analyses.

## 676 **Competing interests**

677           The authors declare no financial or non-financial competing interests.

## 678 **Funding**

679           This work was supported by CAPES scholarship (CL) and Instituto Nacional de  
680 Câncer – Ministério da Saúde.  
681

## 682 Bibliography

- 683 Aggarwal S, John S, Sapra L, Sharma SC, Das SN. 2019. Targeted disruption of  
684 PI3K/Akt/mTOR signaling pathway, via PI3K inhibitors, promotes growth inhibitory  
685 effects in oral cancer cells. *Cancer Chemother Pharmacol* **83**:451–461.  
686 doi:10.1007/s00280-018-3746-x
- 687 Aghbari SMH, Abushouk AI, Attia A, Elmaraezy A, Menshawy A, Ahmed MS,  
688 Elsaadany BA, Ahmed EM. 2017. Malignant transformation of oral lichen planus  
689 and oral lichenoid lesions: A meta-analysis of 20095 patient data. *Oral Oncol*  
690 **68**:92–102. doi:10.1016/j.oraloncology.2017.03.012
- 691 Awasthi A, Kuchroo VK. 2009. Th17 cells: from precursors to players in inflammation  
692 and infection. *Int Immunol* **21**:489–498. doi:10.1093/intimm/dxp021
- 693 Bardellini E, Amadori F, Flocchini P, Bonadeo S, Majorana A. 2013.  
694 Clinicopathological features and malignant transformation of oral lichen planus: a  
695 12-years retrospective study. *Acta Odontol Scand* **71**:834–840.  
696 doi:10.3109/00016357.2012.734407
- 697 Barnard NA, Scully C, Eveson JW, Cunningham S, Porter SR. 1993. Oral cancer  
698 development in patients with oral lichen planus. *J Oral Pathol Med* **22**:421–424.  
699 doi:10.1111/j.1600-0714.1993.tb00134.x
- 700 Barrett T, Wilhite SE, Ledoux P, Evangelista C, Kim IF, Tomashevsky M, Marshall KA,  
701 Phillippy KH, Sherman PM, Holko M, Yefanov A, Lee H, Zhang N, Robertson CL,  
702 Serova N, Davis S, Soboleva A. 2013. NCBI GEO: archive for functional genomics  
703 data sets--update. *Nucleic Acids Res* **41**:D991-5. doi:10.1093/nar/gks1193
- 704 Benjamini Y, Hochberg Y. 1995. Controlling the false discovery rate: a practical and  
705 powerful approach to multiple testing. *Journal of the Royal Statistical Society:*  
706 *Series B (Methodological)* **57**:289–300. doi:10.1111/j.2517-6161.1995.tb02031.x

- 707 Binato R, Santos EC, Boroni M, Demachki S, Assumpção P, Abdelhay E. 2018. A  
708 common molecular signature of intestinal-type gastric carcinoma indicates  
709 processes related to gastric carcinogenesis. *Oncotarget* **9**:7359–7371.  
710 doi:10.18632/oncotarget.23670
- 711 Brown AS, Patel CJ. 2017. A standard database for drug repositioning. *Sci Data*  
712 **4**:170029. doi:10.1038/sdata.2017.29
- 713 Cheng Y-SL, Gould A, Kurago Z, Fantasia J, Muller S. 2016. Diagnosis of oral lichen  
714 planus: a position paper of the American Academy of Oral and Maxillofacial  
715 Pathology. *Oral Surg Oral Med Oral Pathol Oral Radiol* **122**:332–354.  
716 doi:10.1016/j.oooo.2016.05.004
- 717 Chen N-X, Liu K, Liu X, Zhang X-X, Han D-Y. 2020. Induction and regulation of the  
718 immunoproteasome subunit  $\beta 5i$  (PSMB8) in laryngeal and hypopharyngeal  
719 carcinoma cells. *Med Sci Monit* **26**:e923621. doi:10.12659/MSM.923621
- 720 Colaprico A, Silva TC, Olsen C, Garofano L, Cava C, Garolini D, Sabedot TS, Malta  
721 TM, Pagnotta SM, Castiglioni I, Ceccarelli M, Bontempi G, Noushmehr H. 2016.  
722 TCGAblinks: an R/Bioconductor package for integrative analysis of TCGA data.  
723 *Nucleic Acids Res* **44**:e71. doi:10.1093/nar/gkv1507
- 724 Corcoran SE, O’Neill LAJ. 2016. HIF1 $\alpha$  and metabolic reprogramming in inflammation.  
725 *J Clin Invest* **126**:3699–3707. doi:10.1172/JCI84431
- 726 Csardi G, Nepusz T. 2006. The igraph software package for complex  
727 network research. *InterJournal* **1695**.
- 728 Davis S, Meltzer PS. 2007. GEOquery: a bridge between the Gene Expression  
729 Omnibus (GEO) and BioConductor. *Bioinformatics* **23**:1846–1847.  
730 doi:10.1093/bioinformatics/btm254
- 731 Ding X-Q, Wang Z-Y, Xia D, Wang R-X, Pan X-R, Tong J-H. 2020. Proteomic profiling

- 732 of serum exosomes from patients with metastatic gastric cancer. *Front Oncol*  
733 **10**:1113. doi:10.3389/fonc.2020.01113
- 734 Duan Q, Reid SP, Clark NR, Wang Z, Fernandez NF, Rouillard AD, Readhead B,  
735 Tritsch SR, Hodos R, Hafner M, Niepel M, Sorger PK, Dudley JT, Bavari S,  
736 Panchal RG, Ma'ayan A. 2016. L1000CDS2: LINCS L1000 characteristic direction  
737 signatures search engine. *NPJ Syst Biol Appl* **2**. doi:10.1038/npjbsa.2016.15
- 738 Farhi D, Dupin N. 2010. Pathophysiology, etiologic factors, and clinical management  
739 of oral lichen planus, part I: facts and controversies. *Clin Dermatol* **28**:100–108.  
740 doi:10.1016/j.clindermatol.2009.03.004
- 741 Freshour SL, Kiwala S, Cotto KC, Coffman AC, McMichael JF, Song JJ, Griffith M,  
742 Griffith OL, Wagner AH. 2021. Integration of the Drug-Gene Interaction Database  
743 (DGIdb 4.0) with open crowdsourcing efforts. *Nucleic Acids Res* **49**:D1144–D1151.  
744 doi:10.1093/nar/gkaa1084
- 745 Gaur P, Qadir GA, Upadhyay S, Singh AK, Shukla NK, Das SN. 2012. Skewed  
746 immunological balance between Th17 (CD4(+)IL17A (+)) and Treg  
747 (CD4 (+)CD25 (+)FOXP3 (+)) cells in human oral squamous cell  
748 carcinoma. *Cell Oncol (Dordr)* **35**:335–343. doi:10.1007/s13402-012-0093-5
- 749 Ge X, Wang L, Li M, Xu N, Yu F, Yang F, Li R, Zhang F, Zhao B, Du J. 2019. Vitamin  
750 D/VDR signaling inhibits LPS-induced IFN $\gamma$  and IL-1 $\beta$  in Oral epithelia by  
751 regulating hypoxia-inducible factor-1 $\alpha$  signaling pathway. *Cell Commun Signal*  
752 **17**:18. doi:10.1186/s12964-019-0331-9
- 753 Giacomelli L, Oluwadara O, Chiappe G, Barone A, Chiappelli F, Covani U. 2009.  
754 Relationship between human oral lichen planus and oral squamous cell carcinoma  
755 at a genomic level: a datamining study. *Bioinformatics* **4**:258–262.  
756 doi:10.6026/97320630004258

- 757 Giuliani M, Troiano G, Cordaro M, Corsalini M, Gioco G, Lo Muzio L, Pignatelli P,  
758 Lajolo C. 2019. Rate of malignant transformation of oral lichen planus: A  
759 systematic review. *Oral Dis* **25**:693–709. doi:10.1111/odi.12885
- 760 Gonzalez-Moles MA, Scully C, Gil-Montoya JA. 2008. Oral lichen planus:  
761 controversies surrounding malignant transformation. *Oral Dis* **14**:229–243.  
762 doi:10.1111/j.1601-0825.2008.01441.x
- 763 Groettrup M, van den Broek M, Schwarz K, Macagno A, Khan S, de Giuli R, Schmidtke  
764 G. 2001. Structural plasticity of the proteasome and its function in antigen  
765 processing. *Crit Rev Immunol* **21**:339–358.
- 766 Hallopeau H. 1910. Sur un cas de lichen de Wilson gingival avec néoplasie voisine  
767 dans la région maxillaire. . *Bull Soc Fr Dermatol Syphiligr* **32**.
- 768 Heberle H, Meirelles GV, da Silva FR, Telles GP, Minghim R. 2015. InteractiVenn: a  
769 web-based tool for the analysis of sets through Venn diagrams. *BMC*  
770 *Bioinformatics* **16**:169. doi:10.1186/s12859-015-0611-3
- 771 Hopkins AL, Groom CR. 2002. The druggable genome. *Nat Rev Drug Discov* **1**:727–  
772 730. doi:10.1038/nrd892
- 773 Iijima W, Ohtani H, Nakayama T, Sugawara Y, Sato E, Nagura H, Yoshie O, Sasano  
774 T. 2003. Infiltrating CD8+ T cells in oral lichen planus predominantly express  
775 CCR5 and CXCR3 and carry respective chemokine ligands RANTES/CCL5 and  
776 IP-10/CXCL10 in their cytolytic granules: a potential self-recruiting mechanism.  
777 *Am J Pathol* **163**:261–268. doi:10.1016/S0002-9440(10)63649-8
- 778 Ismail SB, Kumar SKS, Zain RB. 2007. Oral lichen planus and lichenoid reactions:  
779 etiopathogenesis, diagnosis, management and malignant transformation. *J Oral*  
780 *Sci* **49**:89–106. doi:10.2334/josnusd.49.89
- 781 Itoiz ME, Conti CJ, Lanfranchi HE, Mamrack M, Klein-Szanto AJ. 1985.

- 782 Immunohistochemical detection of filaggrin in preneoplastic and neoplastic lesions  
783 of the human oral mucosa. *Am J Pathol* **119**:456–461.
- 784 Jassal B, Matthews L, Viteri G, Gong C, Lorente P, Fabregat A, Sidiropoulos K, Cook  
785 J, Gillespie M, Haw R, Loney F, May B, Milacic M, Rothfels K, Sevilla C,  
786 Shamovsky V, Shorser S, Varusai T, Weiser J, Wu G, D'Eustachio P. 2020. The  
787 Reactome Pathway Knowledgebase. *Nucleic Acids Res* **48**:D498–D503.  
788 doi:10.1093/nar/gkz1031
- 789 Johnson WE, Li C, Rabinovic A. 2007. Adjusting batch effects in microarray  
790 expression data using empirical Bayes methods. *Biostatistics* **8**:118–127.  
791 doi:10.1093/biostatistics/kxj037
- 792 Kakumu T, Sato M, Goto D, Kato T, Yogo N, Hase T, Morise M, Fukui T, Yokoi K,  
793 Sekido Y, Girard L, Minna JD, Byers LA, Heymach JV, Coombes KR, Kondo M,  
794 Hasegawa Y. 2017. Identification of proteasomal catalytic subunit PSMA6 as a  
795 therapeutic target for lung cancer. *Cancer Sci* **108**:732–743.  
796 doi:10.1111/cas.13185
- 797 Kazanietz MG, Durando M, Cooke M. 2019. CXCL13 and its receptor CXCR5 in  
798 cancer: inflammation, immune response, and beyond. *Front Endocrinol*  
799 *(Lausanne)* **10**:471. doi:10.3389/fendo.2019.00471
- 800 Kengkarn S, Petmitr S, Boonyuen U, Reamtong O, Poomsawat S, Sanguansin S.  
801 2020. Identification of novel candidate biomarkers for oral squamous cell  
802 carcinoma based on whole gene expression profiling. *Pathol Oncol Res* **26**:2315–  
803 2325. doi:10.1007/s12253-020-00828-w
- 804 Kitamura R, Toyoshima T, Tanaka H, Kawano S, Kiyosue T, Matsubara R, Goto Y,  
805 Hirano M, Oobu K, Nakamura S. 2012. Association of cytokeratin 17 expression  
806 with differentiation in oral squamous cell carcinoma. *J Cancer Res Clin Oncol*

- 807       **138**:1299–1310. doi:10.1007/s00432-012-1202-6
- 808   Kiuchi T, Tomaru U, Ishizu A, Imagawa M, Iwasaki S, Suzuki A, Otsuka N, Ohhara Y,  
809       Kinoshita I, Matsuno Y, Dosaka-Akita H, Kasahara M. 2021. Expression of the  
810       immunoproteasome subunit  $\beta 5i$  in non-small cell lung carcinomas. *J Clin Pathol*  
811       **74**:300–306. doi:10.1136/jclinpath-2020-206618
- 812   Kloetzel PM. 2001. Antigen processing by the proteasome. *Nat Rev Mol Cell Biol*  
813       **2**:179–187. doi:10.1038/35056572
- 814   Kolde R. 2019. pheatmap: Pretty heatmaps. CRAN.
- 815   Krijgsman D, Roelands J, Hendrickx W, Bedognetti D, Kuppen PJK. 2020. HLA-G: A  
816       New Immune Checkpoint in Cancer? *Int J Mol Sci* **21**. doi:10.3390/ijms21124528
- 817   Kurago ZB. 2016. Etiology and pathogenesis of oral lichen planus: an overview. *Oral*  
818       *Surg Oral Med Oral Pathol Oral Radiol* **122**:72–80.  
819       doi:10.1016/j.oooo.2016.03.011
- 820   Langfelder P, Horvath S. 2008. WGCNA: an R package for weighted correlation  
821       network analysis. *BMC Bioinformatics* **9**:559. doi:10.1186/1471-2105-9-559
- 822   Larsen KR, Johansen JD, Reibel J, Zachariae C, Rosing K, Pedersen AML. 2017.  
823       Filaggrin gene mutations and the distribution of filaggrin in oral mucosa of patients  
824       with oral lichen planus and healthy controls. *J Eur Acad Dermatol Venereol*  
825       **31**:887–893. doi:10.1111/jdv.14098
- 826   Leek JT, Johnson WE, Parker HS, Jaffe AE, Storey JD. 2012. The sva package for  
827       removing batch effects and other unwanted variation in high-throughput  
828       experiments. *Bioinformatics* **28**:882–883. doi:10.1093/bioinformatics/bts034
- 829   Lee Y, Awasthi A, Yosef N, Quintana FJ, Xiao S, Peters A, Wu C, Kleinewietfeld M,  
830       Kunder S, Hafler DA, Sobel RA, Regev A, Kuchroo VK. 2012. Induction and  
831       molecular signature of pathogenic TH17 cells. *Nat Immunol* **13**:991–999.

- 832 doi:10.1038/ni.2416
- 833 Leontieva OV, Blagosklonny MV. 2016. Gerosuppression by pan-mTOR inhibitors.  
834 *Aging (Albany NY)* **8**:3535–3551. doi:10.18632/aging.101155
- 835 Liang X, Deng M, Zhang C, Ping F, Wang H, Wang Y, Fan Z, Ren X, Tao X, Wu T, Xu  
836 J, Cheng B, Xia J. 2019. Combined class I histone deacetylase and mTORC1/C2  
837 inhibition suppresses the initiation and recurrence of oral squamous cell  
838 carcinomas by repressing SOX2. *Cancer Lett* **454**:108–119.  
839 doi:10.1016/j.canlet.2019.04.010
- 840 Liao S-C, Hsieh P-C, Huang J-S, Hsu C-W, Yuan K. 2012. Aberrant keratinization of  
841 reticular oral lichen planus is related to elastolysis. *Oral Surg Oral Med Oral Pathol*  
842 *Oral Radiol* **113**:808–816. doi:10.1016/j.oooo.2012.02.007
- 843 Liao Y, Wang J, Jaehnig EJ, Shi Z, Zhang B. 2019. WebGestalt 2019: gene set  
844 analysis toolkit with revamped UIs and APIs. *Nucleic Acids Res* **47**:W199–W205.  
845 doi:10.1093/nar/gkz401
- 846 Liu J, Yang Q, Sun H, Wang X, Saiyin H, Zhang H. 2020. The circ-AMOTL1/ENO1  
847 Axis Implicated in the Tumorigenesis of OLP-Associated Oral Squamous Cell  
848 Carcinoma. *Cancer Manag Res* **12**:7219–7230. doi:10.2147/CMAR.S251348
- 849 Liu Z, Yu S, Ye S, Shen Z, Gao L, Han Z, Zhang P, Luo F, Chen S, Kang M. 2020.  
850 Keratin 17 activates AKT signalling and induces epithelial-mesenchymal transition  
851 in oesophageal squamous cell carcinoma. *J Proteomics* **211**:103557.  
852 doi:10.1016/j.jprot.2019.103557
- 853 Li Q, Song X, Ji Y, Jiang H, Xu L. 2013. The dual mTORC1 and mTORC2 inhibitor  
854 AZD8055 inhibits head and neck squamous cell carcinoma cell growth in vivo and  
855 in vitro. *Biochem Biophys Res Commun* **440**:701–706.  
856 doi:10.1016/j.bbrc.2013.09.130



- 857 Love MI, Huber W, Anders S. 2014. Moderated estimation of fold change  
858 and dispersion for RNA-seq data with DESeq2. *Genome Biol* **15**:550.  
859 doi:10.1186/s13059-014-0550-8
- 860 Ma R-J, Tan Y-Q, Zhou G. 2019. Aberrant IGF1-PI3K/AKT/MTOR signaling pathway  
861 regulates the local immunity of oral lichen planus. *Immunobiology* **224**:455–461.  
862 doi:10.1016/j.imbio.2019.01.004
- 863 McGrath JA, Uitto J. 2008. The filaggrin story: novel insights into skin-barrier function  
864 and disease. *Trends Mol Med* **14**:20–27. doi:10.1016/j.molmed.2007.10.006
- 865 Micci F, Panagopoulos I, Haugom L, Dahlback H-SS, Pretorius ME, Davidson B,  
866 Abeler VM, Tropé CG, Danielsen HE, Heim S. 2013. Genomic aberration patterns  
867 and expression profiles of squamous cell carcinomas of the vulva. *Genes  
868 Chromosomes Cancer* **52**:551–563. doi:10.1002/gcc.22053
- 869 Michifuri Y, Hirohashi Y, Torigoe T, Miyazaki A, Fujino J, Tamura Y, Tsukahara T,  
870 Kanaseki T, Kobayashi J, Sasaki T, Takahashi A, Nakamori K, Yamaguchi A,  
871 Hiratsuka H, Sato N. 2013. Small proline-rich protein-1B is overexpressed in  
872 human oral squamous cell cancer stem-like cells and is related to their growth  
873 through activation of MAP kinase signal. *Biochem Biophys Res Commun* **439**:96–  
874 102. doi:10.1016/j.bbrc.2013.08.021
- 875 Müller S. 2017. Update from the 4th Edition of the World Health Organization of Head  
876 and Neck Tumours: Tumours of the Oral Cavity and Mobile Tongue. *Head Neck  
877 Pathol* **11**:33–40. doi:10.1007/s12105-017-0792-3
- 878 Munkácsy G, Abdul-Ghani R, Mihály Z, Tegze B, Tchernitsa O, Surowiak P, Schäfer  
879 R, Györffy B. 2010. PSMB7 is associated with anthracycline resistance and is a  
880 prognostic biomarker in breast cancer. *Br J Cancer* **102**:361–368.  
881 doi:10.1038/sj.bjc.6605478

- 882 Newman AM, Steen CB, Liu CL, Gentles AJ, Chaudhuri AA, Scherer F, Khodadoust  
883 MS, Esfahani MS, Luca BA, Steiner D, Diehn M, Alizadeh AA. 2019. Determining  
884 cell type abundance and expression from bulk tissues with digital cytometry. *Nat*  
885 *Biotechnol* **37**:773–782. doi:10.1038/s41587-019-0114-2
- 886 Ohkura S, Kondoh N, Hada A, Arai M, Yamazaki Y, Sindoh M, Takahashi M,  
887 Matsumoto I, Yamamoto M. 2005. Differential expression of the keratin-4, -13, -  
888 14, -17 and transglutaminase 3 genes during the development of oral squamous  
889 cell carcinoma from leukoplakia. *Oral Oncol* **41**:607–613.  
890 doi:10.1016/j.oraloncology.2005.01.011
- 891 Patel S, Kartasova T, Segre JA. 2003. Mouse Sprr locus: a tandem array of  
892 coordinately regulated genes. *Mamm Genome* **14**:140–148. doi:10.1007/s00335-  
893 002-2205-4
- 894 Pedersen TL. 2021. ggraph: An Implementation of Grammar of Graphics for Graphs  
895 and Networks. CRAN.
- 896 Pedersen TL. 2020. tidygraph: A Tidy API for Graph Manipulation. CRAN.
- 897 Peng Q, Zhang J, Ye X, Zhou G. 2017. Tumor-like microenvironment in oral lichen  
898 planus: evidence of malignant transformation? *Expert Rev Clin Immunol* **13**:635–  
899 643. doi:10.1080/1744666X.2017.1295852
- 900 Ritchie ME, Phipson B, Wu D, Hu Y, Law CW, Shi W, Smyth GK. 2015. limma powers  
901 differential expression analyses for RNA-sequencing and microarray studies.  
902 *Nucleic Acids Res* **43**:e47. doi:10.1093/nar/gkv007
- 903 Roopashree MR, Gondhalekar RV, Shashikanth MC, George J, Thippeswamy SH,  
904 Shukla A. 2010. Pathogenesis of oral lichen planus--a review. *J Oral Pathol Med*  
905 **39**:729–734. doi:10.1111/j.1600-0714.2010.00946.x
- 906 Ruukonen HMA, Juurikivi A, Kauppila T, Heikkinen AM, Seppänen-Kaijansinkko R.

- 907 2017. High percentage of oral lichen planus and lichenoid lesion in oral squamous  
908 cell carcinomas. *Acta Odontol Scand* **75**:442–445.  
909 doi:10.1080/00016357.2017.1332777
- 910 Russ AP, Lampel S. 2005. The druggable genome: an update. *Drug Discov Today*  
911 **10**:1607–1610. doi:10.1016/S1359-6446(05)03666-4
- 912 Rutz S, Eidenschenk C, Kiefer JR, Ouyang W. 2016. Post-translational regulation of  
913 ROR $\gamma$ t-A therapeutic target for the modulation of interleukin-17-mediated  
914 responses in autoimmune diseases. *Cytokine Growth Factor Rev* **30**:1–17.  
915 doi:10.1016/j.cytogfr.2016.07.004
- 916 Sakamoto K, Aragaki T, Morita K, Kawachi H, Kayamori K, Nakanishi S, Omura K,  
917 Miki Y, Okada N, Katsube K-I, Takizawa T, Yamaguchi A. 2011. Down-regulation  
918 of keratin 4 and keratin 13 expression in oral squamous cell carcinoma and  
919 epithelial dysplasia: a clue for histopathogenesis. *Histopathology* **58**:531–542.  
920 doi:10.1111/j.1365-2559.2011.03759.x
- 921 Schaaïj-Visser TBM, Graveland AP, Gauci S, Braakhuis BJM, Buijze M, Heck AJR,  
922 Kuik DJ, Bloemena E, Leemans CR, Slijper M, Brakenhoff RH. 2009. Differential  
923 proteomics identifies protein biomarkers that predict local relapse of head and  
924 neck squamous cell carcinomas. *Clin Cancer Res* **15**:7666–7675.  
925 doi:10.1158/1078-0432.CCR-09-2134
- 926 Shen X, Wang P, Dai P, Jin B, Tong Y, Lin H, Shi G. 2018. Correlation between human  
927 leukocyte antigen-G expression and clinical parameters in oral squamous cell  
928 carcinoma. *Indian J Cancer* **55**:340–343. doi:10.4103/ijc.IJC\_602\_17
- 929 Shen Z, Chen L, Liu Y-F, Gao T-W, Wang G, Fan X-L, Fan J-Y, Fan P-S, Li C-Y, Liu  
930 B, Dang Y-P, Li C-X. 2006. Altered keratin 17 peptide ligands inhibit in vitro  
931 proliferation of keratinocytes and T cells isolated from patients with psoriasis. *J*

- 932 *Am Acad Dermatol* **54**:992–1002. doi:10.1016/j.jaad.2006.02.033
- 933 Shen Z-Y, Liu W, Feng J-Q, Zhou H-W, Zhou Z-T. 2011. Squamous cell carcinoma  
934 development in previously diagnosed oral lichen planus: de novo or  
935 transformation? *Oral Surg Oral Med Oral Pathol Oral Radiol Endod* **112**:592–596.  
936 doi:10.1016/j.tripleo.2011.05.029
- 937 Shimada K, Ochiai T, Hasegawa H. 2018. Ectopic transglutaminase 1 and 3  
938 expression accelerating keratinization in oral lichen planus. *J Int Med Res*  
939 **46**:4722–4730. doi:10.1177/0300060518798261
- 940 Stathias V, Turner J, Koleti A, Vidovic D, Cooper D, Fazel-Najafabadi M, Pilarczyk M,  
941 Terryn R, Chung C, Umeano A, Clarke DJB, Lachmann A, Evangelista JE,  
942 Ma'ayan A, Medvedovic M, Schürer SC. 2020. LINCS Data Portal 2.0: next  
943 generation access point for perturbation-response signatures. *Nucleic Acids Res*  
944 **48**:D431–D439. doi:10.1093/nar/gkz1023
- 945 Subramanian A, Tamayo P, Mootha VK, Mukherjee S, Ebert BL, Gillette MA,  
946 Paulovich A, Pomeroy SL, Golub TR, Lander ES, Mesirov JP. 2005. Gene set  
947 enrichment analysis: a knowledge-based approach for interpreting genome-wide  
948 expression profiles. *Proc Natl Acad Sci USA* **102**:15545–15550.  
949 doi:10.1073/pnas.0506580102
- 950 Szklarczyk D, Gable AL, Lyon D, Junge A, Wyder S, Huerta-Cepas J, Simonovic M,  
951 Doncheva NT, Morris JH, Bork P, Jensen LJ, Mering C von. 2019. STRING v11:  
952 protein-protein association networks with increased coverage, supporting  
953 functional discovery in genome-wide experimental datasets. *Nucleic Acids Res*  
954 **47**:D607–D613. doi:10.1093/nar/gky1131
- 955 Tan S, Li H, Zhang W, Shao Y, Liu Y, Guan H, Wu J, Kang Y, Zhao J, Yu Q, Gu Y,  
956 Ding K, Zhang M, Qian W, Zhu Y, Cai H, Chen C, Lobie PE, Zhao X, Sun J, Zhu

- 957 T. 2018. NUDT21 negatively regulates PSMB2 and CXXC5 by alternative  
958 polyadenylation and contributes to hepatocellular carcinoma suppression.  
959 *Oncogene* **37**:4887–4900. doi:10.1038/s41388-018-0280-6
- 960 van der Waal I. 2010. Potentially malignant disorders of the oral and oropharyngeal  
961 mucosa; present concepts of management. *Oral Oncol* **46**:423–425.  
962 doi:10.1016/j.oraloncology.2010.02.016
- 963 Walsh CJ, Hu P, Batt J, Santos CCD. 2015. Microarray Meta-Analysis and Cross-  
964 Platform Normalization: Integrative Genomics for Robust Biomarker Discovery.  
965 *Microarrays (Basel)* **4**:389–406. doi:10.3390/microarrays4030389
- 966 Wang H, Zhang D, Han Q, Zhao X, Zeng X, Xu Y, Sun Z, Chen Q. 2016. Role of  
967 distinct CD4(+) T helper subset in pathogenesis of oral lichen planus. *J Oral Pathol*  
968 *Med* **45**:385–393. doi:10.1111/jop.12405
- 969 Wang X-X, Sun H-Y, Yang Q-Z, Guo B, Sai Y, Zhang J. 2017. Hypoxia-inducible  
970 factor-1 $\alpha$  and glucose transporter 1 in the malignant transformation of oral lichen  
971 planus. *Int J Clin Exp Pathol* **10**:8369–8376.
- 972 Wang Z, Yang M-Q, Lei L, Fei L-R, Zheng Y-W, Huang W-J, Li Z-H, Liu C-C, Xu H-T.  
973 2019. Overexpression of KRT17 promotes proliferation and invasion of non-small  
974 cell lung cancer and indicates poor prognosis. *Cancer Manag Res* **11**:7485–7497.  
975 doi:10.2147/CMAR.S218926
- 976 Warnakulasuriya S, Johnson NW, van der Waal I. 2007. Nomenclature and  
977 classification of potentially malignant disorders of the oral mucosa. *J Oral Pathol*  
978 *Med* **36**:575–580. doi:10.1111/j.1600-0714.2007.00582.x
- 979 Wickham H. 2016. ggplot2 - Elegant Graphics for Data Analysis, 2nd ed. Cham:  
980 Springer International Publishing. doi:10.1007/978-3-319-24277-4
- 981 Wickham LF. 1895. Sur un signe pathognomonique de lichen de Wilson (lichen plan)

- 982 stries et ponctuations grisartres. *Ann Dermatol Syphiligr (Paris)* **6**:517–520.
- 983 Yang C-Y, Liu C-R, Chang IY-F, OuYang C-N, Hsieh C-H, Huang Y-L, Wang C-I, Jan  
984 F-W, Wang W-L, Tsai T-L, Liu H, Tseng C-P, Chang Y-S, Wu C-C, Chang K-P.  
985 2020. Cotargeting CHK1 and PI3K Synergistically Suppresses Tumor Growth of  
986 Oral Cavity Squamous Cell Carcinoma in Patient-Derived Xenografts. *Cancers*  
987 *(Basel)* **12**. doi:10.3390/cancers12071726
- 988 Yang Q, Sun H, Wang X, Yu X, Zhang J, Guo B, Hexige S. 2020. Metabolic changes  
989 during malignant transformation in primary cells of oral lichen planus: Succinate  
990 accumulation and tumour suppression. *J Cell Mol Med* **24**:1179–1188.  
991 doi:10.1111/jcmm.14376
- 992 Yu G, He Q-Y. 2016. ReactomePA: an R/Bioconductor package for reactome pathway  
993 analysis and visualization. *Mol Biosyst* **12**:477–479. doi:10.1039/c5mb00663e
- 994 Zerfas BL, Maresh ME, Trader DJ. 2020. The immunoproteasome: an emerging target  
995 in cancer and autoimmune and neurological disorders. *J Med Chem* **63**:1841–  
996 1858. doi:10.1021/acs.jmedchem.9b01226
- 997 Zhang B, Horvath S. 2005. A general framework for weighted gene co-expression  
998 network analysis. *Stat Appl Genet Mol Biol* **4**:Article17. doi:10.2202/1544-  
999 6115.1128

1000

## 1001 **Supporting information**

1002 **Supplementary File 1** – Supplementary Figures S1-S6

1003 **Supplementary File 2** – Supplementary Tables S1-S10
